# Supplementary material for: The RNA-Binding Motif Protein Family in Cancer: Friend or Foe?
Source: Front Oncol. 2021 Nov 4;11:757135. doi: 10.3389/fonc.2021.757135 (PMC8600070; doi:10.3389/fonc.2021.757135)
Supplement: Supplementary Table 1 — The member of the RBM protein family. [file Table_1.xlsx]

## Sheet: Sheet2
Gene Symbol	Description	Category	Summary	An important paralog
RBM3	RNA Binding Motif Protein 3	Protein Coding	Expression of this gene is induced by cold shock and low oxygen tension. Diseases associated with RBM3 include Testicular Malignant Germ Cell Cancer and Noonan Syndrome 6.	CIBP
RBM4	RNA Binding Motif Protein 4	Protein Coding	Diseases associated with RBM4 include Down Syndrome. Among its related pathways are BMAL1-CLOCK,NPAS2 activates circadian gene expression and Circadian rythm related genes.	RBM4B
RBM5	RNA Binding Motif Protein 5	Protein Coding	This gene encoded protein plays a role in the induction of cell cycle arrest and apoptosis through pre-mRNA splicing of multiple target genes including the tumor suppressor protein p53. This gene is located within the tumor suppressor region 3p21.3, and may play a role in the inhibition of tumor transformation and progression of several malignancies including lung cancer. Diseases associated with…	RBM10
RBM5-AS1	RBM5 Antisense RNA 1	RNA Gene	This gene produces a non-coding RNA in antisense to the RNA binding motif protein 5 (RBM5) gene, and is affiliated with the lncRNA class This transcript interacts with beta catenin and may regulate expression of WNT target genes. Diseases associated with RBM5-AS1 include Glioblastoma and Colorectal Cancer.
RBM6	RNA Binding Motif Protein 6	Protein Coding	RBM6 (RNA Binding Motif Protein 6) is a Protein Coding gene. Diseases associated with RBM6 include Testis Seminoma and Lung Cancer.	RBM10
RBM7	RNA Binding Motif Protein 7	Protein Coding	RBM7 (RNA Binding Motif Protein 7) is a Protein Coding gene. Diseases associated with RBM7 include Pontocerebellar Hypoplasia.	ENSG00000255663
RBM8A	RNA Binding Motif Protein 8A	Protein Coding	It is preferentially associated with mRNAs produced by splicing, including both nuclear mRNAs and newly exported cytoplasmic mRNAs. It is thought that the protein remains associated with spliced mRNAs as a tag to indicate where introns had been present, thus coupling pre- and post-mRNA splicing events. Diseases associated with RBM8A include Thrombocytopenia-Absent Radius Syndrome and Thrombocytop…
RBM10	RNA Binding Motif Protein 10	Protein Coding	The encoded protein associates with hnRNP proteins and may be involved in regulating alternative splicing. Defects in this gene are the cause of the X-linked recessive disorder, TARP syndrome. Alternate splicing results in multiple transcript variants. Diseases associated with RBM10 include Tarp Syndrome and Skin Angiosarcoma.	RBM5
RBM11	RNA Binding Motif Protein 11	Protein Coding	RBM11 (RNA Binding Motif Protein 11) is a Protein Coding gene. Gene Ontology (GO) annotations related to this gene include nucleic acid binding and nucleotide binding.	RBM7
RBM12	RNA Binding Motif Protein 12	Protein Coding	This gene and the gene for copine I overlap at map location 20q11.21. Alternative splicing in the 5' UTR results in four transcript variants. All variants encode the same protein. Diseases associated with RBM12 include Schizophrenia 19 and Schizoaffective Disorder	RBM12B
RBM12B	RNA Binding Motif Protein 12B	Protein Coding	Diseases associated with RBM12B include Primary Cerebellar Degeneration and Boucher-Neuhauser Syndrome.	RBM12
RBM14	RNA Binding Motif Protein 14	Protein Coding	This gene encodes a ribonucleoprotein that functions as a general nuclear coactivator, and an RNA splicing modulator. This protein contains two RNA recognition motifs (RRM) at the N-terminus, and multiple hexapeptide repeat domain at the C-terminus that interacts with thyroid hormone receptor-binding protein (TRBP), and is required for transcription activation. Alternatively spliced transcript va…	PABPC1
RBM14-RBM4	RBM14-RBM4 Readthrough	Protein Coding	This locus represents naturally occurring read-through transcription between the neighboring RBM14 (RNA binding motif protein 14) and RBM4 (RNA binding motif protein 4) genes. Alternative splicing results in multiple transcript variants, one of which encodes a fusion protein that shares sequence identity with each individual gene product. This fusion protein contains RRM and zinc finger domains, …	RBM4
RBM15	RNA Binding Motif Protein 15	Protein Coding	Members of the SPEN (Split-end) family of proteins, including RBM15, have repressor function in several signaling pathways and may bind to RNA through interaction with spliceosome components.Diseases associated with RBM15 include Megakaryoblastic Acute Myeloid Leukemia With T(1;22)(P13;Q13) and Acute Megakaryocytic Leukemia.	RBM15B
RBM15B	RNA Binding Motif Protein 15B	Protein Coding	Members of the SPEN (Split-end) family of proteins, including RBM15B, have repressor function in several signaling pathways and may bind to RNA through interaction with spliceosome components.Diseases associated with RBM15B include Severe Congenital Neutropenia 1 and Immunodeficiency With Hyper-Igm, Type 5.	RBM15
RBM17	RNA Binding Motif Protein 17	Protein Coding	The encoded protein is part of the spliceosome complex and functions in the second catalytic step of mRNA splicing. Alternatively spliced transcript variants have been described. Related pseudogenes exist on chromosomes 9 and 15. Diseases associated with RBM17 include Spinocerebellar Ataxia 1 and Dentatorubral-Pallidoluysian Atrophy.
RBM18	RNA Binding Motif Protein 18	Protein Coding	RBM18 (RNA Binding Motif Protein 18) is a Protein Coding gene. Gene Ontology (GO) annotations related to this gene include nucleic acid binding and nucleotide binding.
RBM19	RNA Binding Motif Protein 19	Protein Coding	The encoded protein may be involved in regulating ribosome biogenesis. Multiple alternatively spliced variants, encoding the same protein, have been identified. Diseases associated with RBM19 include Autosomal Dominant Non-Syndromic Intellectual Disability 1 and Ulnar-Mammary Syndrome	NCI
RBM20	RNA Binding Motif Protein 20	Protein Coding	This gene encodes a protein that binds RNA and regulates splicing. Mutations in this gene have been associated with familial dilated cardiomyopathy. Diseases associated with RBM20 include Cardiomyopathy, Dilated, 1Dd and Dilated Cardiomyopathy.	PTBP1
RBM22	RNA Binding Motif Protein 22	Protein Coding	The encoded protein may play a role in cell division and may be involved in pre-mRNA splicing. Related pseudogenes exist on chromosomes 6, 7, 9, 13, 16, 18, and X. Among its related pathways are mRNA Splicing - Major Pathway and Gene Expression.
RBM23	RNA Binding Motif Protein 23	Protein Coding	This gene encodes a member of the U2AF-like family of RNA binding proteins. This protein interacts with some steroid nuclear receptors, localizes to the promoter of a steroid- responsive gene, and increases transcription of steroid-responsive transcriptional reporters in a hormone-dependent manner. It is also implicated in the steroid receptor-dependent regulation of alternative splicing. Multipl…	RBM39
RBM24	RNA Binding Motif Protein 24	Protein Coding	Diseases associated with RBM24 include Atrial Septal Defect 2 and Neuropathy, Hereditary Sensory And Autonomic, Type Iii.	RBM38
RBM25	RNA Binding Motif Protein 25	Protein Coding	Diseases associated with RBM25 include Atrial Septal Defect 9 and Brugada Syndrome.
RBM26	RNA Binding Motif Protein 26	Protein Coding	Diseases associated with RBM26 include Cutaneous T Cell Lymphoma and Helsmoortel-Van Der Aa Syndrome.	RBM27
RBM27	RNA Binding Motif Protein 27	Protein Coding	Diseases associated with RBM27 include Mucocutaneous Leishmaniasis and Failure Of Tooth Eruption, Primary.	ENSG00000275740
RBM28	RNA Binding Motif Protein 28	Protein Coding	The protein encoded by this gene is a specific nucleolar component of the spliceosomal small nuclear ribonucleoprotein (snRNP)complexes . It specifically associates with U1, U2, U4, U5, and U6 small nuclear RNAs (snRNAs), possibly coordinating their transition through the nucleolus. Mutation in this gene causes alopecia, progressive neurological defects, and endocrinopathy (ANE syndrome), a pleio…	CELF2
RBM33	RNA Binding Motif Protein 33	Protein Coding	Diseases associated with RBM33 include Acheiropody and Tibia, Hypoplasia Or Aplasia Of, With Polydactyly.
RBM34	RNA Binding Motif Protein 34	Protein Coding	The encoded protein contains an RNA-binding domain made up of two RNA recognition motif subdomains referred to as RNA recognition motif-1 and RNA recognition motif-2. Alternative splicing results in multiple transcript variants.	PABPC3
RBM38	RNA Binding Motif Protein 38	Protein Coding	Diseases associated with RBM38 include Lung Cancer and Erythema Infectiosum.	RBM24
RBM39	RNA Binding Motif Protein 39	Protein Coding	This gene encodes a member of the U2AF65 family of proteins. The encoded protein is found in the nucleus, where it co-localizes with core spliceosomal proteins. It has been shown to play a role in both steroid hormone receptor-mediated transcription and alternative splicing, and it is also a transcriptional coregulator of the viral oncoprotein v-Rel. Multiple transcript variants have been observe…	RBM23
RBM41	RNA Binding Motif Protein 41	Protein Coding	RBM41 is a Protein Coding gene. Gene Ontology (GO) annotations related to this gene include nucleic acid binding and nucleotide binding.	RNPC3
RBM42	RNA Binding Motif Protein 42	Protein Coding	RBM42 is a Protein Coding gene. Gene Ontology (GO) annotations related to this gene include nucleic acid binding and nucleotide binding.
RBM43	RNA Binding Motif Protein 43	Protein Coding	RBM43 is a Protein Coding gene. Gene Ontology (GO) annotations related to this gene include nucleic acid binding and nucleotide binding.	NMI
RBM44	RNA Binding Motif Protein 44	Protein Coding	RBM44 is a Protein Coding gene. Gene Ontology (GO) annotations related to this gene include nucleic acid binding and RNA binding.
RBM45	RNA Binding Motif Protein 45	Protein Coding	This gene encodes a member of the RNA recognition motif (RRM)-type RNA-binding family of proteins. This protein exhibits preferential binding to poly(C) RNA. Initial cloning of this gene found that the rat ortholog was dynamically expressed in the developing rat brain. This protein has been localized to inclusion bodies in the brain and spinal cord of amyotrophic lateral sclerosis and Alzheimer's…	PABPC4
RBM46	RNA Binding Motif Protein 46	Protein Coding	Diseases associated with RBM46 include Basal Cell Nevus Syndrome.	A1CF
RBM47	RNA Binding Motif Protein 47	Protein Coding	Diseases associated with RBM47 include Lung Acinar Adenocarcinoma.	A1CF
RBM48	RNA Binding Motif Protein 48	Protein Coding	Diseases associated with RBM48 include Nephronophthisis and Peroxisome Biogenesis Disorder 1B.
RBM4B	RNA Binding Motif Protein 4B	Protein Coding	Diseases associated with RBM4B include Episodic Ataxia, Type 6. Among its related pathways are Circadian rythm related genes.	RBM4
RBMS1	RNA Binding Motif Single Stranded Interacting Protein 1	Protein Coding	This gene encodes a member of a small family of proteins which bind single stranded DNA/RNA. These proteins are characterized by the presence of two sets of ribonucleoprotein consensus sequence (RNP-CS) that contain conserved motifs, RNP1 and RNP2, originally described in RNA binding proteins, and required for DNA binding. These proteins have been implicated in such diverse functions as DNA repli…	RBMS3
RBMS2	RNA Binding Motif Single Stranded Interacting Protein 2	Protein Coding	The protein encoded by this gene is a member of a small family of proteins which bind single stranded DNA/RNA. These proteins are characterized by the presence of two sets of ribonucleoprotein consensus sequence (RNP-CS) that contain conserved motifs, RNP1 and RNP2, originally described in RNA binding proteins, and required for DNA binding. The RBMS proteins have been implicated in such diverse f…
RBMS3	RNA Binding Motif Single Stranded Interacting Protein 3	Protein Coding	This gene encodes an RNA-binding protein that belongs to the c-myc gene single-strand binding protein family. These proteins are characterized by the presence of two sets of ribonucleoprotein consensus sequence (RNP-CS) that contain conserved motifs, RNP1 and RNP2, originally described in RNA binding proteins, and required for DNA binding. These proteins have been implicated in such diverse funct…	RBMS1
RBMX	RNA Binding Motif Protein X-Linked	Protein Coding	This gene belongs to the RBMY gene family which includes candidate Y chromosome spermatogenesis genes. This gene, an active X chromosome homolog of the Y chromosome RBMY gene, is widely expressed whereas the RBMY gene evolved a male-specific function in spermatogenesis. Pseudogenes of this gene, found on chromosomes 1, 4, 9, 11, and 6, were likely derived by retrotransposition from the original g…	RBMXL1
RBMX2	RNA Binding Motif Protein X-Linked 2	Protein Coding	Diseases associated with RBMX2 include Theileriasis and Spermatogenic Failure, X-Linked, 1.	CSTF2T
RBMXL1	RBMX Like 1	Protein Coding	This gene represents a retrogene of RNA binding motif protein, X-linked (RBMX), which is located on chromosome X. While all introns in the coding sequence have been processed out compared to the RBMX locus, the ORF is intact and there is specific evidence for transcription at this location. The preservation of the ORF by purifying selection in all Old World monkeys carrying it suggests that this …	RBMX
RBMXL2	RBMX Like 2	Protein Coding	This gene belongs to the HNRPG subfamily of ubiquitously expressed heterogeneous nuclear ribonucleoproteins (hnRNPs). The hnRNPs are RNA binding proteins and they complex with heterogeneous nuclear RNA (hnRNA). These proteins are associated with pre-mRNAs in the nucleus and appear to influence pre-mRNA processing and other aspects of mRNA metabolism and transport. While all of the hnRNPs are pres…	RBMX
RBMXL3	RBMX Like 3	Protein Coding	Diseases associated with RBMXL3 include Cardiomyopathy, Familial Restrictive, 3 and Retinitis Pigmentosa 38.	RBMXL2
RBMY1A1	RNA Binding Motif Protein Y-Linked Family 1 Member A1	Protein Coding	This gene encodes a protein containing an RNA-binding motif in the N-terminus and four SRGY (serine, arginine, glycine, tyrosine) boxes in the C-terminus. This protein is thought to function as a splicing regulator during spermatogenesis. Multiple closely related paralogs of this gene are found in a gene cluster in the AZFb azoospermia factor region of chromosome Y. Most of these related copies a…	RBMY1J
RBMY1B	RNA Binding Motif Protein Y-Linked Family 1 Member B	Protein Coding	This gene encodes a protein containing an RNA-binding motif in the N-terminus and four SRGY (serine, arginine, glycine, tyrosine) boxes in the C-terminus. This protein likely functions as a splicing factor during spermatogenesis. Multiple closely related paralogs of this gene are found in a gene cluster in the AZFb azoospermia factor region of chromosome Y. Most of these related copies are though…	RBMY1A1
RBMY1C	RNA Binding Motif Protein Y-Linked Family 1 Member C	Protein Coding	RBMY1C is a Protein Coding gene. Gene Ontology (GO) annotations related to this gene include RNA binding and nucleotide binding.
RBMY1D	RNA Binding Motif Protein Y-Linked Family 1 Member D	Protein Coding	This gene encodes a protein containing an RNA-binding motif in the N-terminus and four SRGY (serine, arginine, glycine, tyrosine) boxes in the C-terminus. This protein likely functions as a splicing factor during spermatogenesis. Multiple closely related paralogs of this gene are found in a gene cluster in the AZFb azoospermia factor region of chromosome Y. Most of these related copies are though…	RBMY1A1
RBMY1E	RNA Binding Motif Protein Y-Linked Family 1 Member E	Protein Coding	This gene encodes a protein containing an RNA-binding motif in the N-terminus and four SRGY (serine, arginine, glycine, tyrosine) boxes in the C-terminus. Multiple copies of this gene are found in the AZFb azoospermia factor region of chromosome Y and the encoded protein is thought to be involved in spermatogenesis. Most copies of this locus are pseudogenes, although six highly similar copies hav…	RBMY1A1
RBMY1F	RNA Binding Motif Protein Y-Linked Family 1 Member F	Protein Coding	This gene encodes a protein containing an RNA-binding motif in the N-terminus and four SRGY (serine, arginine, glycine, tyrosine) boxes in the C-terminus. Multiple copies of this gene are found in the AZFb azoospermia factor region of chromosome Y and the encoded protein is thought to be involved in spermatogenesis. Most copies of this locus are pseudogenes, although six highly similar copies hav…	RBMY1J
RBMY1J	RNA Binding Motif Protein Y-Linked Family 1 Member J	Protein Coding	This gene encodes a protein containing an RNA-binding motif in the N-terminus and four SRGY (serine, arginine, glycine, tyrosine) boxes in the C-terminus. This protein likely functions as a splicing factor during spermatogenesis. Multiple closely related paralogs of this gene are found in a gene cluster in the AZFb azoospermia factor region of chromosome Y. Most of these related copies are though…	RBMY1F
RBMY1HP	RNA Binding Motif Protein Y-Linked Family 1 Member H, Pseudogene	Pseudogene
RBMY2BP	RNA Binding Motif Protein Y-Linked Family 2 Member B, Pseudogene	Pseudogene
RBMY2AP	RNA Binding Motif Protein Y-Linked Family 2 Member A, Pseudogene	Pseudogene
RBM8B	RNA Binding Motif Protein 8B Pseudogene	Pseudogene
RBMY3AP	RNA Binding Motif Protein Y-Linked Family 3 Member A, Pseudogene	Pseudogene
RBMY2MP	RNA Binding Motif Protein Y-Linked Family 2 Member M, Pseudogene	Pseudogene
RBMY2SP	RNA Binding Motif Protein Y-Linked Family 2 Member S, Pseudogene	Pseudogene
RBMY1A3P	RNA Binding Motif Protein Y-Linked Family 1 Member A3, Pseudogene	Pseudogene
RBMY1GP	RNA Binding Motif Protein Y-Linked Family 1 Member G, Pseudogene	Pseudogene
RBMY2TP	RNA Binding Motif Protein Y-Linked Family 2 Member T, Pseudogene	Pseudogene
RBMY2FP	RNA Binding Motif Protein Y-Linked Family 2 Member F, Pseudogene	Pseudogene
RBMS2P1	RNA Binding Motif Single Stranded Interacting Protein 2 Pseudogene 1	Pseudogene
RBMY2KP	RNA Binding Motif Protein Y-Linked Family 2 Member K, Pseudogene	Pseudogene
RBMY2NP	RNA Binding Motif Protein Y-Linked Family 2 Member N, Pseudogene	Pseudogene
RBMY2OP	RNA Binding Motif Protein Y-Linked Family 2 Member O, Pseudogene	Pseudogene
RBMY2QP	RNA Binding Motif Protein Y-Linked Family 2 Member Q, Pseudogene	Pseudogene
RBMY2UP	RNA Binding Motif Protein Y-Linked Family 2 Member U, Pseudogene	Pseudogene
RBMY2WP	RNA Binding Motif Protein Y-Linked Family 2 Member W, Pseudogene	Pseudogene
RBMY2GP	RNA Binding Motif Protein Y-Linked Family 2 Member G, Pseudogene	Pseudogene
RBMY2HP	RNA Binding Motif Protein Y-Linked Family 2 Member H, Pseudogene	Pseudogene
RBMY2JP	RNA Binding Motif Protein Y-Linked Family 2 Member J, Pseudogene	Pseudogene
RBMY2CP	RNA Binding Motif Protein Y-Linked Family 2 Member C, Pseudogene	Pseudogene
RBMY2VP	RNA Binding Motif Protein Y-Linked Family 2 Member V, Pseudogene	Pseudogene
RBMY2EP	RNA Binding Motif Protein Y-Linked Family 2 Member E, Pseudogene	Pseudogene
RBMS1P1	RNA Binding Motif Single Stranded Interacting Protein 1 Pseudogene 1	Pseudogene
RBMY2DP	RNA Binding Motif Protein Y-Linked Family 2 Member D, Pseudogene	Pseudogene
RBM22P13	RNA Binding Motif Protein 22 Pseudogene 13	Pseudogene
RBMY2XP	RNA Binding Motif Protein Y-Linked Family 2 Member X, Pseudogene	Pseudogene
RBMY2YP	RNA Binding Motif Protein Y-Linked Family 2 Member Y, Pseudogene	Pseudogene
RBMY1KP	RNA Binding Motif Protein Y-Linked Family 1 Member K, Pseudogene	Pseudogene
RBM22P6	RNA Binding Motif Protein 22 Pseudogene 6	Pseudogene
RBM22P7	RNA Binding Motif Protein 22 Pseudogene 7	Pseudogene
RBM22P11	RNA Binding Motif Protein 22 Pseudogene 11	Pseudogene
RBM22P1	RNA Binding Motif Protein 22 Pseudogene 1	Pseudogene
RBM48P1	RNA Binding Motif Protein 48 Pseudogene 1	Pseudogene
RBM11P1	RNA Binding Motif Protein 11 Pseudogene 1	Pseudogene
RBM17P4	RNA Binding Motif Protein 17 Pseudogene 4	Pseudogene
RBM22P2	RNA Binding Motif Protein 22 Pseudogene 2	Pseudogene
RBM43P1	RNA Binding Motif Protein 43 Pseudogene 1	Pseudogene
RBM22P3	RNA Binding Motif Protein 22 Pseudogene 3	Pseudogene
RBM22P5	RNA Binding Motif Protein 22 Pseudogene 5	Pseudogene
RBM17P1	RNA Binding Motif Protein 17 Pseudogene 1	Pseudogene
RBM22P12	RNA Binding Motif Protein 22 Pseudogene 12	Pseudogene
RBM17P3	RNA Binding Motif Protein 17 Pseudogene 3	Pseudogene
RBM22P4	RNA Binding Motif Protein 22 Pseudogene 4	Pseudogene
RBM17P2	RNA Binding Motif Protein 17 Pseudogene 2	Pseudogene
RBMXP1	RBMX Pseudogene 1	Pseudogene
RBMXP4	RBMX Pseudogene 4	Pseudogene
RBMX2P5	RBMX2 Pseudogene 5	Pseudogene
RBMXP2	RBMX Pseudogene 2	Pseudogene
RBMXP3	RBMX Pseudogene 3	Pseudogene
RBM39P1	RBM39 Pseudogene 1	Pseudogene
RBMX2P1	RBMX2 Pseudogene 1	Pseudogene
RBMX2P2	RBMX2 Pseudogene 2	Pseudogene
RBMX2P3	RBMX2 Pseudogene 3	Pseudogene
RBMX2P4	RBMX2 Pseudogene 4	Pseudogene
RBMXP5	RBMX Pseudogene 5	Pseudogene
RBM7P1	RBM7 Pseudogene 1	Pseudogene
